# Supplementary material
Source: Royal Society of Chemistry journal article supplement (doi:10.1039/d6nj00948d)
Supplement: d6nj00948d1.pdf [file d6nj00948d1.pdf]

ELECTRONIC SUPPLEMENTARY INFORMATION

**Dynamic NMR spectroscopic and computational studies of 1H-pyrazoles: determination of the prototropic barriers**

Ibon Alkorta,<sup>a</sup> Rosa M. Claramunt,<sup>\*b</sup> José Cumella,<sup>a</sup> José Elguero,<sup>a</sup> Felipe Reviriego,<sup>c</sup> Albert Virgili<sup>d</sup>

<sup>a</sup>Instituto de Química Médica, CSIC, Juan de la Cierva, 3, E-28006 Madrid, Spain

<sup>b</sup>Departamento de Química Orgánica y Bio-Orgánica, Facultad de Ciencias, UNED, Avda. Esparta, s/n, Las Rozas-Madrid, E-28232, Spain

<sup>c</sup>Instituto de Ciencia y Tecnología de Polímeros, ICTP-CSIC, Juan de la Cierva 3 E-28006 Madrid, Spain

<sup>d</sup>Departament de Química, Universitat Autònoma de Barcelona, 08193 Bellaterra, Spain

INDEX

Table 1. Electronic energy, geometry and NMR parameters of the isolated monomers.....p. 1

Table 2. Electronic energy (Hartree) and geometry (Å) of the complexes with two methanol molecules in their minimum and TS disposition.....p. 3

**Table 1. Electronic energy, geometry and NMR parameters of the isolated monomers**

| Electronic energy (Hartree) and geometry (Å)                                                                                                                                                                                                                                                                                                                                                          | NMR results (ppm)                                                                                                                                                                                                                                                           |
|-------------------------------------------------------------------------------------------------------------------------------------------------------------------------------------------------------------------------------------------------------------------------------------------------------------------------------------------------------------------------------------------------------|-----------------------------------------------------------------------------------------------------------------------------------------------------------------------------------------------------------------------------------------------------------------------------|
| <b>1</b><br>Electronic Energy= -226.265991267<br>NIMAG= 0<br>N,0,0.0350835863,1.0865851359,0.<br>H,0,0.1170172379,2.0902519918,0.<br>N,0,1.1570204554,0.3396247682,0.<br>C,0,-1.1009738268,0.3427550969,0.<br>C,0,0.7163991153,-0.9147706809,0.<br>C,0,-0.6959342496,-0.9760569573,0.<br>H,0,-2.0795936045,0.7953462614,0.<br>H,0,1.4250450086,-1.7292533108,0.<br>H,0,-1.3241431679,-1.8513790231,0. | <b>1</b><br>*****<br>Atom      σ      δ<br>1N      38.77   -188.68<br>2H      22.63   9.05<br>3N      -81.39   -75.01<br>4C      53.10   124.57<br>5C      38.13   138.99<br>6C      73.74   104.69<br>7H      24.45   7.28<br>8H      24.20   7.53<br>9H      25.52   6.25 |
| <b>2</b><br>Electronic Energy= -304.927097402<br>NIMAG= 0<br>C,1.1227686987,-0.1131146924,0.<br>N,0.7294232747,1.1565235677,0.<br>N,-0.6246203978,1.0973969879,0.<br>C,-1.1103798879,-0.1731420261,0.<br>C,0.0043693636,-0.9887255985,0.<br>H,0.0111658263,-2.0674324282,0.<br>C,-2.5726268833,-0.4834658611,0.                                                                                       | <b>2</b><br>*****<br>Atom      σ      δ<br>1C      27.15   149.56<br>2N      -75.54   -80.54<br>3N      43.39   -193.04<br>4C      39.65   137.52<br>5C      74.49   103.97<br>6H      26.06   5.72<br>7C      172.08   9.98<br>8H      29.76   2.14                        |

|                                                                                                                                                                                                                                                                                                                                                                                                                                                                                                                                                                                                                                                              |                                                                                                                                                                                                                                                                                                                                                                                                                                                                                                                                                                                                               |       |       |      |     |       |      |     |        |       |     |       |      |     |       |      |     |       |      |     |       |      |
|--------------------------------------------------------------------------------------------------------------------------------------------------------------------------------------------------------------------------------------------------------------------------------------------------------------------------------------------------------------------------------------------------------------------------------------------------------------------------------------------------------------------------------------------------------------------------------------------------------------------------------------------------------------|---------------------------------------------------------------------------------------------------------------------------------------------------------------------------------------------------------------------------------------------------------------------------------------------------------------------------------------------------------------------------------------------------------------------------------------------------------------------------------------------------------------------------------------------------------------------------------------------------------------|-------|-------|------|-----|-------|------|-----|--------|-------|-----|-------|------|-----|-------|------|-----|-------|------|-----|-------|------|
| <p>H,-3.0729446396,-<br/>0.0760458013,0.8843908819<br/>H,-3.0729446396,-0.0760458013,-<br/>0.8843908819<br/>H,-2.7242632429,-1.5632978399,0.<br/>C,2.5782501887,-0.4639973793,0.<br/>H,2.8446901322,-1.0536763599,-<br/>0.8823338239<br/>H,3.1791548626,0.4462958863,0.<br/>H,2.8446901322,-<br/>1.0536763599,0.8823338239<br/>H,-1.1477709498,1.9579182346,0.</p>                                                                                                                                                                                                                                                                                           | <table border="1"> <tbody> <tr><td>9H</td><td>29.76</td><td>2.14</td></tr> <tr><td>10H</td><td>29.70</td><td>2.20</td></tr> <tr><td>11C</td><td>168.18</td><td>13.74</td></tr> <tr><td>12H</td><td>29.74</td><td>2.16</td></tr> <tr><td>13H</td><td>29.61</td><td>2.28</td></tr> <tr><td>14H</td><td>29.74</td><td>2.16</td></tr> <tr><td>15H</td><td>23.39</td><td>8.31</td></tr> </tbody> </table>                                                                                                                                                                                                          | 9H    | 29.76 | 2.14 | 10H | 29.70 | 2.20 | 11C | 168.18 | 13.74 | 12H | 29.74 | 2.16 | 13H | 29.61 | 2.28 | 14H | 29.74 | 2.16 | 15H | 23.39 | 8.31 |
| 9H                                                                                                                                                                                                                                                                                                                                                                                                                                                                                                                                                                                                                                                           | 29.76                                                                                                                                                                                                                                                                                                                                                                                                                                                                                                                                                                                                         | 2.14  |       |      |     |       |      |     |        |       |     |       |      |     |       |      |     |       |      |     |       |      |
| 10H                                                                                                                                                                                                                                                                                                                                                                                                                                                                                                                                                                                                                                                          | 29.70                                                                                                                                                                                                                                                                                                                                                                                                                                                                                                                                                                                                         | 2.20  |       |      |     |       |      |     |        |       |     |       |      |     |       |      |     |       |      |     |       |      |
| 11C                                                                                                                                                                                                                                                                                                                                                                                                                                                                                                                                                                                                                                                          | 168.18                                                                                                                                                                                                                                                                                                                                                                                                                                                                                                                                                                                                        | 13.74 |       |      |     |       |      |     |        |       |     |       |      |     |       |      |     |       |      |     |       |      |
| 12H                                                                                                                                                                                                                                                                                                                                                                                                                                                                                                                                                                                                                                                          | 29.74                                                                                                                                                                                                                                                                                                                                                                                                                                                                                                                                                                                                         | 2.16  |       |      |     |       |      |     |        |       |     |       |      |     |       |      |     |       |      |     |       |      |
| 13H                                                                                                                                                                                                                                                                                                                                                                                                                                                                                                                                                                                                                                                          | 29.61                                                                                                                                                                                                                                                                                                                                                                                                                                                                                                                                                                                                         | 2.28  |       |      |     |       |      |     |        |       |     |       |      |     |       |      |     |       |      |     |       |      |
| 14H                                                                                                                                                                                                                                                                                                                                                                                                                                                                                                                                                                                                                                                          | 29.74                                                                                                                                                                                                                                                                                                                                                                                                                                                                                                                                                                                                         | 2.16  |       |      |     |       |      |     |        |       |     |       |      |     |       |      |     |       |      |     |       |      |
| 15H                                                                                                                                                                                                                                                                                                                                                                                                                                                                                                                                                                                                                                                          | 23.39                                                                                                                                                                                                                                                                                                                                                                                                                                                                                                                                                                                                         | 8.31  |       |      |     |       |      |     |        |       |     |       |      |     |       |      |     |       |      |     |       |      |
| <p>3<br/>Electronic Energy= -430.825922595<br/>NIMAG= 0<br/>N,0,-0.5949805676,-2.0598564253,0.<br/>N,0,0.7607562029,-2.1014551342,0.<br/>C,0,1.1384338528,-0.8340436435,0.<br/>C,0,0.0080842794,0.0139855312,0.<br/>C,0,-1.1001206661,-0.8127196049,0.<br/>H,0,-1.1066195006,-2.928932265,0.<br/>H,0,2.1806409737,-0.5591054806,0.<br/>H,0,-2.1535498582,-0.5890475526,0.<br/>N,0,-0.0123130134,1.449303825,0.<br/>O,0,-1.1096069098,2.0023078571,0.<br/>O,0,1.0696575968,2.0273413728,0.</p>                                                                                                                                                                | <p>3<br/>*****<br/>Atom      <math>\sigma</math>      <math>\delta</math><br/>1N      38.94      -188.84<br/>2N      -81.64      -74.76<br/>3C      40.70      136.51<br/>4C      37.99      139.12<br/>5C      51.36      126.24<br/>6H      22.76      8.92<br/>7H      23.72      7.99<br/>8H      23.86      7.86<br/>9N      -135.71      -23.62<br/>10O      -315.39      533.22<br/>11O      -329.04      545.48</p>                                                                                                                                                                                   |       |       |      |     |       |      |     |        |       |     |       |      |     |       |      |     |       |      |     |       |      |
| <p>4<br/>Electronic Energy= -509.491826882<br/>NIMAG= 0<br/>C,-1.11559534,-0.78867259,0.<br/>N,-0.65147207,-2.02805492,0.<br/>N,0.70453017,-1.90658806,0.<br/>C,1.15244165,-0.63847028,0.<br/>C,-0.01683018,0.12299596,0.<br/>C,2.59958784,-0.28486072,0.<br/>H,3.21584157,-1.18687592,0.<br/>H,2.84918329,0.31753913,-0.87504968<br/>H,2.84918329,0.31753913,0.87504968<br/>C,-2.58349369,-0.52029927,0.<br/>H,-2.87475176,0.06365159,-0.87516106<br/>H,-3.11924852,-1.46977239,0.<br/>H,-2.87475176,0.06365159,0.87516106<br/>H,1.2659323,-2.7444488,0.<br/>N,-0.06936557,1.54947508,0.<br/>O,0.99971309,2.16468325,0.<br/>O,-1.17642407,2.08454802,0.</p> | <p>4<br/>*****<br/>Atom      <math>\sigma</math>      <math>\delta</math><br/>1C      26.55      150.14<br/>2N      -66.07      -89.50<br/>3N      41.13      -190.91<br/>4C      35.32      141.68<br/>5C      43.63      133.68<br/>6C      168.56      13.37<br/>7H      30.07      1.84<br/>8H      29.13      2.74<br/>9H      29.13      2.74<br/>10C      166.48      15.38<br/>11H      29.33      2.55<br/>12H      29.54      2.34<br/>13H      29.33      2.55<br/>14H      23.40      8.30<br/>15N      -140.32      -19.26<br/>16O      -309.12      527.59<br/>17O      -321.97      539.13</p> |       |       |      |     |       |      |     |        |       |     |       |      |     |       |      |     |       |      |     |       |      |

The  $\delta$  values are obtained from the  $\sigma$  ones and the equations described in:

<sup>1</sup>H: A. M. S. Silva, et al. Magn. Reson. Chem. 2008, 46, 859-864

<sup>13</sup>C: F. Blanco, I. Alkorta, J. Elguero Magn. Reson. Chem. 2007, 45, 797-800

<sup>15</sup>N: F. Blanco, I. Alkorta, J. Elguero Magn. Reson. Chem. 2007, 45, 797-800

<sup>17</sup>O: D. Sanz, et al. Magn. Reson. Chem. 2012, 50, 246-255

**Table 2. Electronic energy (Hartree) and geometry (Å) of the complexes with two methanol molecules in their minimum and TS disposition.**

| Min                                                                                                                                                                                                                                                                                                                                                                                                                                                                                                                                                                                                                                                                                                                                                                                                                                                                                                                                                                                                                          | TS                                                                                                                                                                                                                                                                                                                                                                                                                                                                                                                                                                                                                                                                                                                                                                                                                                                                                                                                                                                |
|------------------------------------------------------------------------------------------------------------------------------------------------------------------------------------------------------------------------------------------------------------------------------------------------------------------------------------------------------------------------------------------------------------------------------------------------------------------------------------------------------------------------------------------------------------------------------------------------------------------------------------------------------------------------------------------------------------------------------------------------------------------------------------------------------------------------------------------------------------------------------------------------------------------------------------------------------------------------------------------------------------------------------|-----------------------------------------------------------------------------------------------------------------------------------------------------------------------------------------------------------------------------------------------------------------------------------------------------------------------------------------------------------------------------------------------------------------------------------------------------------------------------------------------------------------------------------------------------------------------------------------------------------------------------------------------------------------------------------------------------------------------------------------------------------------------------------------------------------------------------------------------------------------------------------------------------------------------------------------------------------------------------------|
| 1<br>Electronic Energy= -457.830459368<br>NIMAG= 0<br>N,0.2875674328,1.0083952623,-0.1507978569<br>H,0.5428724406,1.9872949665,-0.3305893621<br>N,1.262487152,0.1528249184,0.2197910457<br>C,-0.915425961,0.4011074948,-0.2360285272<br>C,0.6566482775,-1.0248547398,0.3725445346<br>C,-0.7209848531,-0.9280276817,0.0976068009<br>H,-1.8027651145,0.9436259236,-0.5204214377<br>H,1.2285336506,-1.8902706231,0.6714136266<br>H,-1.4629426191,-1.7081232461,0.1363311159<br>H,2.8952414231,1.0502312917,0.3621712708<br>O,3.5527617529,1.7820727012,0.3721800987<br>O,1.5922982985,3.498880593,-0.4387358489<br>C,4.2934511896,1.7451002938,1.5868840117<br>H,4.9734164384,2.5983441287,1.5861998315<br>H,3.6408838291,1.8176789427,2.4650300297<br>H,4.8890560147,0.828233343,1.6614280284<br>H,2.4219076282,3.0695148667,-0.1366126611<br>C,1.8634105093,4.3374530478,-1.5564430492<br>H,2.2933129505,3.7749402342,-2.3935689039<br>H,0.9174555644,4.7761725958,-1.8780355281<br>H,2.5470934355,5.1505651663,-1.2878523195 | 1 (TS)<br>Electronic Energy= -457.799908918<br>NIMAG= 1<br>N,-0.2435061794,0.6322681418,-0.9799206352<br>H,-0.3979404457,1.0741826126,0.2263248981<br>N,0.2435061794,-0.6322681418,-0.9799206352<br>C,-0.3961976188,1.0302555465,-2.2506074828<br>C,0.3961976188,-1.0302555465,-2.2506074828<br>C,0.,0.,-3.1057204764<br>H,-0.7750018029,2.0144431031,-2.4799977183<br>H,0.7750018029,-2.0144431031,-2.4799977183<br>H,0.,0.,-4.1832753252<br>H,0.3979404457,-1.0741826126,0.2263248981<br>O,0.4240349571,-1.1212880584,1.4270422551<br>O,-0.4240349571,1.1212880584,1.4270422551<br>C,-0.3705974849,-2.1550375895,1.9999441815<br>H,-0.4667586434,-1.9887367881,3.0759569904<br>H,-1.3743661593,-2.1863821202,1.5587720418<br>H,0.1164597999,-3.1211076894,1.8417847709<br>H,0.,0.,1.5935978484<br>C,0.3705974849,2.1550375895,1.9999441815<br>H,1.3743661593,2.1863821202,1.5587720418<br>H,-0.1164597999,3.1211076894,1.8417847709<br>H,0.4667586434,1.9887367881,3.0759569904 |
| 2<br>Electronic Energy= -536.491485550<br>NIMAG= 0<br>N,0.2830984944,1.0166886285,-0.1363596895<br>H,0.5374190123,1.990920385,-0.3288774431<br>N,1.270141208,0.1543434147,0.2114817075<br>C,-0.9297614261,0.418944782,-0.1862537498<br>C,0.6729069562,-1.0241383099,0.3890814355<br>C,-0.7161489432,-0.9083528902,0.1500110688<br>H,-1.4619291559,-1.6849888,0.213748074<br>H,2.8824282987,1.0454640569,0.3205144808<br>O,3.5545483886,1.7674195045,0.3229185399<br>O,1.6170725032,3.5189525317,-0.4726092585<br>C,4.2790126685,1.7424663499,1.5466059832<br>H,4.9734460234,2.5841886857,1.5391356896<br>H,3.6173351812,1.8424364391,2.415478984<br>H,4.8590500851,0.8178263566,1.6476707431<br>H,2.4382821905,3.0667145195,-0.1807728251<br>C,1.8961974656,4.3345100622,-1.6041281641<br>H,2.2973153105,3.7495388631,-2.4404557351<br>H,0.958984021,4.7969408699,-1.9186340783<br>H,2.6074172576,5.1312000971,-1.3574568294                                                                                                 | 2 (TS)<br>Electronic Energy= -536.461302702<br>NIMAG= 1<br>N,-0.11881589,0.66650746,-0.45707086<br>H,-0.17693107,1.11691627,0.61962226<br>N,0.11881589,-0.66650746,-0.45707086<br>C,-0.19428482,1.1014553,-1.72273798<br>C,0.19428482,-1.1014553,-1.72273798<br>C,0.,0.,-2.56448274<br>H,0.,0.,-3.6428692<br>H,0.17693107,-1.11691627,0.61962226<br>O,0.21222837,-1.18220406,1.97101211<br>O,-0.21222837,1.18220406,1.97101211<br>C,-0.70091286,-2.03036021,2.63986229<br>H,-0.70252441,-1.82136246,3.71589129<br>H,-1.72992927,-1.90777634,2.27079917<br>H,-0.40983408,-3.07803604,2.50311211<br>H,0.,0.,2.12507977<br>C,0.70091286,2.03036021,2.63986229<br>H,1.72992927,1.90777634,2.27079917<br>H,0.40983408,3.07803604,2.50311211<br>H,0.70252441,1.82136246,3.71589129                                                                                                                                                                                                      |

|                                                                                                                                                                                                                                                                                                                                                                                                                                                                                                                                                                                                                                                                                                                                                                                                                                                                                                                                                                                                                                                                                                                                                                                    |                                                                                                                                                                                                                                                                                                                                                                                                                                                                                                                                                                                                                                                                                                                                                                                                                                                                                                                                                                                                                                                                                                                         |
|------------------------------------------------------------------------------------------------------------------------------------------------------------------------------------------------------------------------------------------------------------------------------------------------------------------------------------------------------------------------------------------------------------------------------------------------------------------------------------------------------------------------------------------------------------------------------------------------------------------------------------------------------------------------------------------------------------------------------------------------------------------------------------------------------------------------------------------------------------------------------------------------------------------------------------------------------------------------------------------------------------------------------------------------------------------------------------------------------------------------------------------------------------------------------------|-------------------------------------------------------------------------------------------------------------------------------------------------------------------------------------------------------------------------------------------------------------------------------------------------------------------------------------------------------------------------------------------------------------------------------------------------------------------------------------------------------------------------------------------------------------------------------------------------------------------------------------------------------------------------------------------------------------------------------------------------------------------------------------------------------------------------------------------------------------------------------------------------------------------------------------------------------------------------------------------------------------------------------------------------------------------------------------------------------------------------|
| <p>C,1.4556132937,-2.2358848156,0.7895237936<br/> H,2.5185587881,-1.9970898774,0.8490305997<br/> H,1.1335066699,-2.6122006453,1.765130674<br/> H,1.3273895752,-3.0463582283,0.0663020525<br/> C,-2.1770774512,1.1564009352,-0.5549507473<br/> H,-2.329602621,2.0303113433,0.0849661937<br/> H,-2.1457389105,1.5047632046,-1.5919601036<br/> H,-3.043839794,0.503462947,-0.4468662359</p>                                                                                                                                                                                                                                                                                                                                                                                                                                                                                                                                                                                                                                                                                                                                                                                           | <p>C,0.41927276,-2.543101,-2.0516817<br/> H,0.91991703,-3.05725916,-1.22930545<br/> H,-0.52838083,-3.05570774,-2.24336264<br/> H,1.03728024,-2.64240048,-2.94601978<br/> C,-0.41927276,2.543101,-2.0516817<br/> H,-0.91991703,3.05725916,-1.22930545<br/> H,0.52838083,3.05570774,-2.24336264<br/> H,-1.03728024,2.64240048,-2.94601978</p>                                                                                                                                                                                                                                                                                                                                                                                                                                                                                                                                                                                                                                                                                                                                                                             |
| <p>3<br/> Electronic Energy= -662.391213607<br/> NIMAG= 0<br/> N,0.2980110022,0.9810085646,-0.1680928273<br/> H,0.5875795948,1.9584867799,-0.3522393973<br/> N,1.2494856028,0.1046578134,0.246057352<br/> C,-0.9099608843,0.4161141768,-0.2827939926<br/> C,0.6290013124,-1.0559354614,0.4005572469<br/> C,-0.7350238971,-0.9116602191,0.0792112701<br/> H,-1.7900867977,0.9510222716,-0.5976065167<br/> H,1.1516367682,-1.9402830836,0.7268241863<br/> H,2.9520896324,1.0303529323,0.4297755602<br/> O,3.5676743076,1.7899524366,0.4188356671<br/> O,1.5657279677,3.4173240671,-0.4444117852<br/> C,4.3754921361,1.7791448297,1.5939066429<br/> H,5.0237590361,2.6550088913,1.5530785393<br/> H,3.7685729184,1.8326409222,2.5047898704<br/> H,5.0040287823,0.8832483708,1.6333440265<br/> H,2.4144859501,3.0416374189,-0.124933435<br/> C,1.8003696779,4.2988911803,-1.5408456925<br/> H,2.2973297731,3.7875474481,-2.3726393614<br/> H,0.8317668753,4.667369283,-1.8809805129<br/> H,2.4083568045,5.1557604654,-1.2330613402<br/> N,-1.7513761264,-1.9222098358,0.1139537162<br/> O,-1.414476696,-3.0497570974,0.4639889014<br/> O,-2.8910375903,-1.5944795747,-0.2082109482</p> | <p>3 (TS)<br/> Electronic Energy= -662.365268654<br/> NIMAG= 1<br/> N,-0.2194313359,0.6512467151,0.2244985252<br/> H,-0.3639893102,1.135017066,1.6144038352<br/> N,0.2194313359,-0.6512467151,0.2244985252<br/> C,-0.3562141183,1.0578410989,-1.03466847<br/> C,0.3562141183,-1.0578410989,-1.03466847<br/> C,0.,0.,-1.8791921713<br/> H,-0.690643356,2.0498105622,-1.2926548564<br/> H,0.690643356,-2.0498105622,-1.2926548564<br/> H,0.3639893102,-1.135017066,1.6144038352<br/> O,0.3583885419,-1.1425130854,2.6942830171<br/> O,-0.3583885419,1.1425130854,2.6942830171<br/> C,-0.506447913,-2.1555058777,3.2324538627<br/> H,-0.5595810474,-2.0223375842,4.3129999012<br/> H,-1.5104981691,-2.0849173144,2.8046971134<br/> H,-0.0823092257,-3.1365471552,3.0143106657<br/> H,0.,0.,2.8574463159<br/> C,0.506447913,2.1555058777,3.2324538627<br/> H,1.5104981691,2.0849173144,2.8046971134<br/> H,0.0823092257,3.1365471552,3.0143106657<br/> H,0.5595810474,2.0223375842,4.3129999012<br/> N,0.,0.,-3.307253063<br/> O,-0.3440493393,1.033748422,-3.8803055002<br/> O,0.3440493393,-1.033748422,-3.8803055002</p> |
| <p>4<br/> Electronic Energy= -741.056796672<br/> NIMAG= 0<br/> N,-0.1411183263,0.7357463652,0.2941048044<br/> H,-0.195741064,1.3222582907,2.1152629744<br/> N,0.0388863347,-0.6151362785,0.2569133024<br/> C,-0.1563318531,1.1458737251,-0.9666145908<br/> C,0.1426659414,-1.1055355652,-0.9840745341<br/> C,0.019674998,0.0159518677,-1.8132639958<br/> H,0.0697904578,-1.1226900968,1.1555957471<br/> O,0.1095449108,-1.439548099,2.9216485783<br/> O,-0.1585090412,1.2643031111,3.0930703365<br/> C,-0.725883388,-2.2619014354,3.7324694503<br/> H,-0.3980531814,-2.2495185734,4.7772964539<br/> H,-1.7746965807,-1.9480057654,3.6839699893<br/> H,-0.6466734127,-3.2838561209,3.3590139611<br/> H,0.0448391169,-0.5048305024,3.2149081307<br/> C,0.7072665759,2.2728218868,3.6067104198<br/> H,1.7219790233,2.1832651733,3.2019992897<br/> H,0.3221754665,3.2747958947,3.388319021<br/> H,0.7506108757,2.1484240418,4.6893560256</p>                                                                                                                                                                                                                                           | <p>4 (TS)<br/> Electronic Energy= -741.028805544<br/> NIMAG= 1<br/> N,-0.1255583523,0.6774081441,0.4426527925<br/> H,-0.1906387922,1.1658415636,1.7973623547<br/> N,0.1255583523,-0.6774081441,0.4426527925<br/> C,-0.2068041005,1.1144915974,-0.8109165076<br/> C,0.2068041005,-1.1144915974,-0.8109165076<br/> C,0.,0.,-1.6542311854<br/> H,0.1906387922,-1.1658415636,1.7973623547<br/> O,0.1836035166,-1.1832231366,2.8962398542<br/> O,-0.1836035166,1.1832231366,2.8962398542<br/> C,-0.8288151535,-2.0466988793,3.431173337<br/> H,-0.8702370158,-1.9052789279,4.5116808903<br/> H,-1.8086466896,-1.8249298489,2.997555951<br/> H,-0.5624939407,-3.0836358585,3.2195112581<br/> H,0.,0.,3.0608127567<br/> C,0.8288151535,2.0466988793,3.431173337<br/> H,1.8086466896,1.8249298489,2.997555951<br/> H,0.5624939407,3.0836358585,3.2195112581<br/> H,0.8702370158,1.9052789279,4.5116808903</p>                                                                                                                                                                                                                   |

|                                             |                                             |
|---------------------------------------------|---------------------------------------------|
| C,0.3440077226,-2.5548149631,-1.2660628493  | C,0.47323144,-2.5468679291,-1.1349665621    |
| H,0.4087856873,-3.1181745766,-0.3335004667  | H,0.5968867938,-3.11912583,-0.2138119313    |
| H,-0.4777472174,-2.9474322205,-1.8680725061 | H,-0.3447864946,-2.9744701948,-1.7186873779 |
| H,1.2573349655,-2.7100190501,-1.8431254312  | H,1.3743061198,-2.6476462359,-1.7433237759  |
| C,-0.3367869668,2.5863455591,-1.3115497348  | C,-0.47323144,2.5468679291,-1.1349665621    |
| H,-0.4535561188,3.1676176669,-0.3961818983  | H,-0.5968867938,3.11912583,-0.2138119313    |
| H,0.5193101701,2.9637588346,-1.8746609087   | H,0.3447864946,2.9744701948,-1.7186873779   |
| H,-1.21490241,2.7287628783,-1.9445753744    | H,-1.3743061198,2.6476462359,-1.7433237759  |
| N,0.0659634072,0.0035851894,-3.238323414    | N,0.,0.,-3.0754096113                       |
| O,-0.0531439083,1.0774664726,-3.8280446806  | O,-0.1915381921,1.0719463923,-3.6569483171  |
| O,0.2227021649,-1.0825939699,-3.8007031798  | O,0.1915381921,-1.0719463923,-3.6569483171  |
